# Supplementary material for: Monolayer molecular probes for detection of trace amounts of cyanide anions
Source: Royal Society of Chemistry journal article supplement (doi:10.1039/c5ra21989b), 2015-01-01
Supplement: c5ra21989b1.pdf [file c5ra21989b1.pdf]

Supporting Information

Monolayer Molecular Probes for Efficient Detection of Trace Amount Cyanide Anions

Fei Wu,<sup>a</sup> Shangbi Zhao,<sup>a</sup> Linna Zhu<sup>\*a</sup>

<sup>a</sup>Chongqing Key Laboratory for Advanced Materials and Technologies of Clean Energy, Faculty of Materials and Energy, Southwest University, Chongqing 400715, P.R. China.

**Corresponding Author:** Linna Zhu, Faculty of Materials and Energy, Chongqing, China, E-mail address: lnzhu@swu.edu.cn. Tel.: +86 23 68254957.

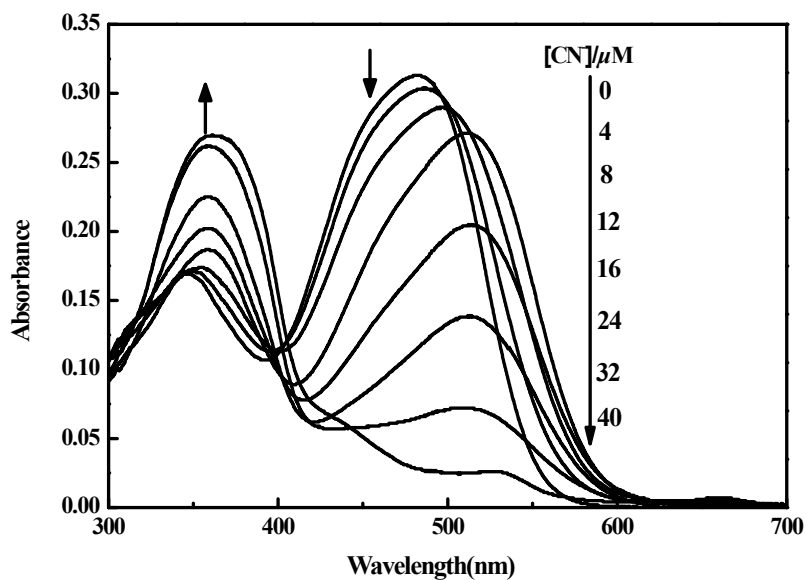

Figure S1. Absorption spectra change of P1 (5 μM) in the presence of increasing concentrations of CN<sup>-</sup> (0-40 μM) in THF solution.

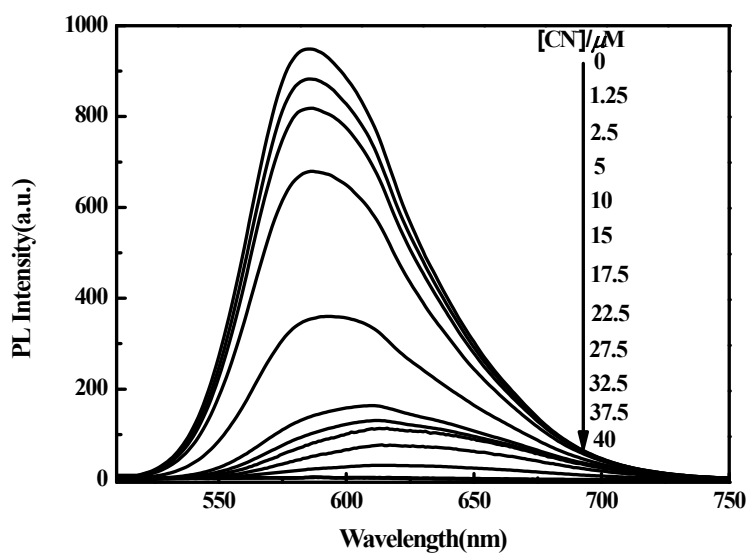

Figure S2. Fluorescence titration of P1 ( $5 \mu\text{M}$ ) to cyanide ions in THF solution. Inset shows the NIR emission color changes before and after addition of  $\text{CN}^-$ .

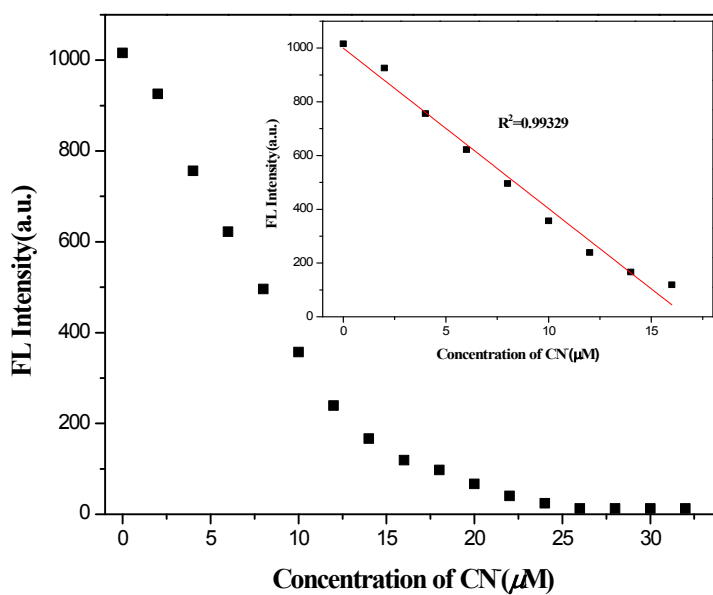

Figure S3. Plots of fluorescence intensity at 590 nm of P1 ( $5 \mu\text{M}$ ) with the addition of  $\text{CN}^-$  in THF.  $\lambda_{\text{ex}} = 500 \text{ nm}$ . Slits: 3 nm/5 nm. Inset: fluorescence intensity at 590 nm as a linear function of  $\text{CN}^-$  concentration from 0 to  $16 \mu\text{M}$ .

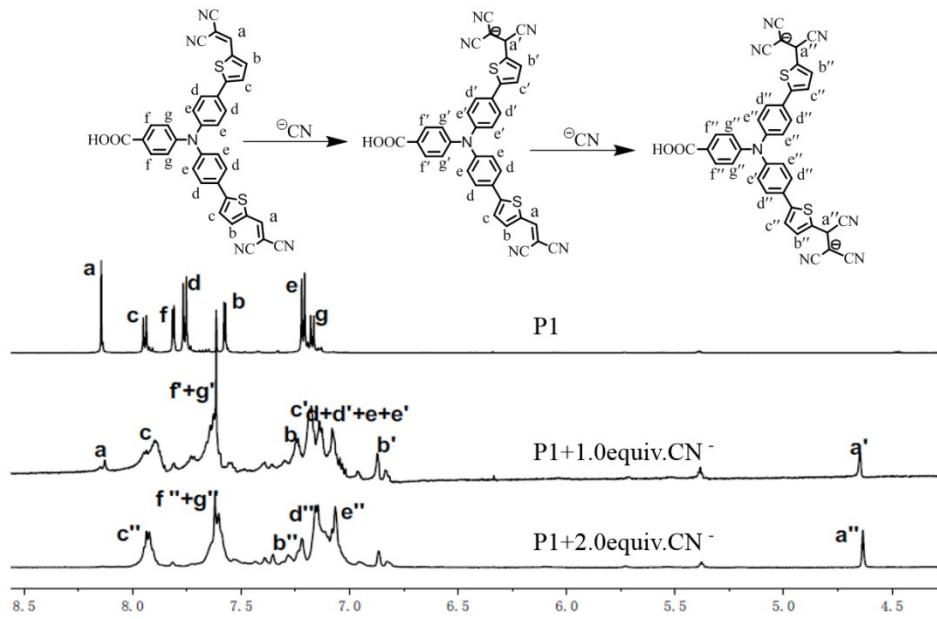

Figure S4. Partial  $^1\text{H}$  NMR spectral changes upon the addition of cyanide anion to P1 in  $\text{CD}_3\text{CN}$ .

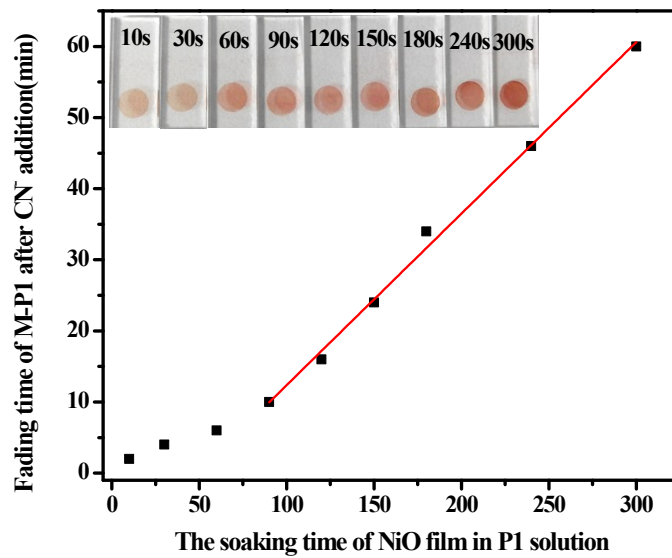

Figure S5. Fading time of M-P1 after treatment of  $\text{CN}^-$  versus the soaking time of NiO film in P1

solution. Inset shows the film colors of M-P1 under different soaking time of NiO film.

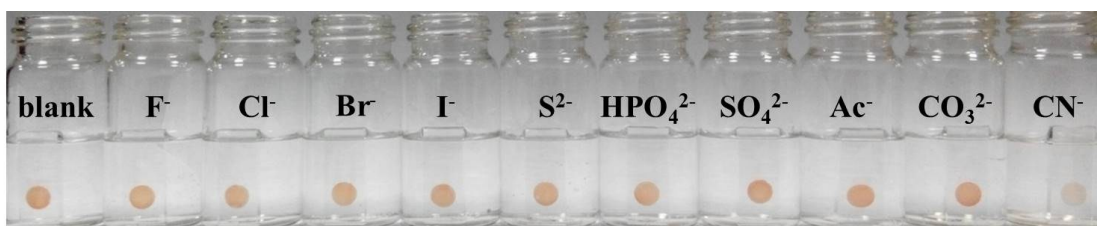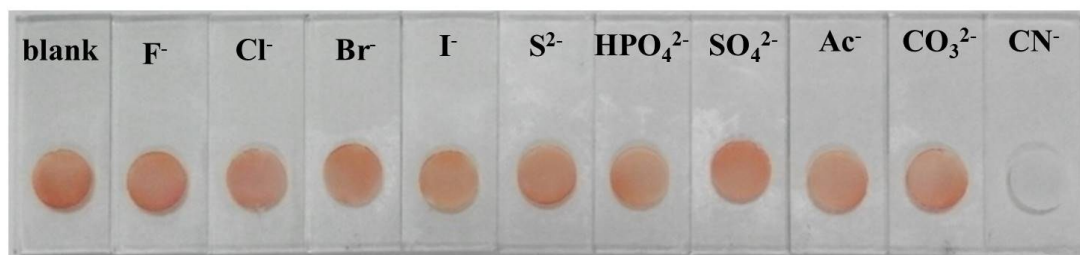

Figure S6. Photographs of M-P1 (on  $\text{TiO}_2$  films) immersed into different anions solution. Upside: photos taken with M-P1 immersed in anion solution; downside: the glasses are taken out from the anions solution.

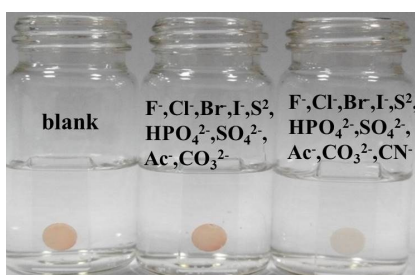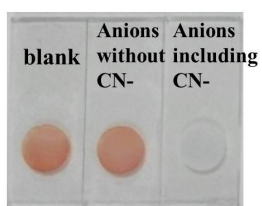

Figure S7. Photographs of M-P1 on  $\text{TiO}_2$  films and its color change when soaked in the mixed anions solution in the presence and absence of  $\text{CN}^-$ .

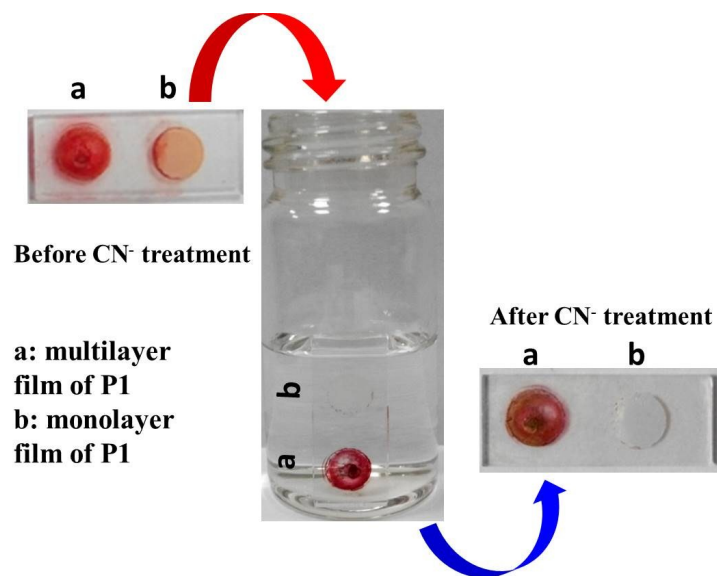

Figure S8. The monolayer and multilayer P1 before and after immersing into the CN<sup>-</sup> solution. a) represents the multilayer P1, and b) shows the monolayer of P1.
